# Supplementary material
Source: PubMed Central journal article supplement (PMC2631945)

Supplemental figure 1. Tandem mass spectrometric data corresponding to the fragments of the ion observed in figure 3D.

| Ion type  | Obs ion | Obs Mass | Cal Mass | Error (Da) |
|-----------|---------|----------|----------|------------|
| B3        | 328.96  | 327.9527 | 328.14   | -0.19      |
| B4        | 476.25  | 475.2427 | 475.21   | 0.04       |
| B5        | 575.15  | 574.1427 | 574.28   | -0.13      |
| B6        | 646.03  | 645.0227 | 645.31   | -0.29      |
| B7        | 717.4   | 716.3927 | 716.35   | 0.04       |
| B8        | 864.39  | 863.3827 | 863.42   | -0.04      |
| B9        | 979.42  | 978.4127 | 978.44   | -0.03      |
| B10       | 1078.38 | 1077.373 | 1077.51  | -0.14      |
| B11       | 1193.38 | 1192.373 | 1192.54  | -0.17      |
| B12       | 1264.36 | 1263.353 | 1263.58  | -0.22      |
| B13       | 1635.48 | 1634.473 | 1634.76  | -0.29      |
| Y2        | 518.44  | 517.4327 | 517.28   | 0.16       |
| Y3        | 589.44  | 588.4327 | 588.31   | 0.12       |
| Y4        | 704.41  | 703.4027 | 703.34   | 0.06       |
| Y5        | 803.38  | 802.3727 | 802.41   | -0.04      |
| Y6        | 918.40  | 917.3927 | 917.43   | -0.04      |
| Y7        | 1065.38 | 1064.373 | 1064.50  | -0.13      |
| Y8        | 1136.43 | 1135.423 | 1135.54  | -0.12      |
| Y9        | 1207.38 | 1206.373 | 1206.58  | -0.20      |
| Y10       | 1306.59 | 1305.583 | 1305.65  | -0.06      |
| Y11       | 1453.41 | 1452.403 | 1452.71  | -0.31      |
| Y12       | 1567.46 | 1566.453 | 1566.76  | -0.30      |
| Y6-G      | 861.21  | 860.2027 | 860.41   | -0.21      |
| Intact-GG | 834.41  | 1666.80  | 1666.81  | -0.01      |

Supplemental figure 2. PCR of WT and *prcBA* mutant using *pupfor* and *protmutr2* primers. Lane 1, DNA ladder; lane 2, WT; lane 3, *prcba* mutant.

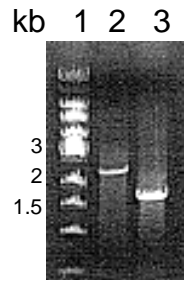

Supplemental figure 3. Decay of pupylated proteins in *prcba* mutant *M. smegmatis* complemented with a vector containing *prcba*, as observed by western blotting with penta-his-HRP conjugated antibody followed by chemiluminescence detection.

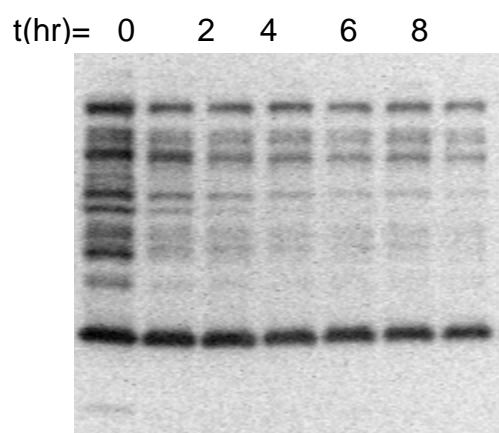

Supplemental figure 4. (A) SDS-PAGE analysis showing the decay of non-pupylated proteins in WT *M. smegmatis* extracts (left) and *prcbA* mutant extracts (right), as observed by Coomassie blue staining. (B) Quantification of (A) using ImageQuant (Amersham Biosciences). WT in triangles, *prcbA* mutant in squares.

A

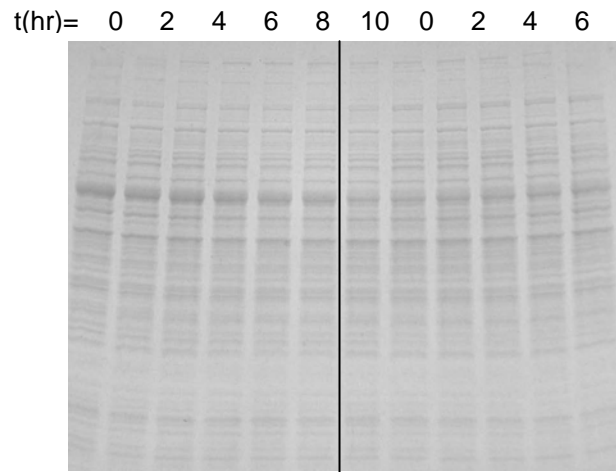

B

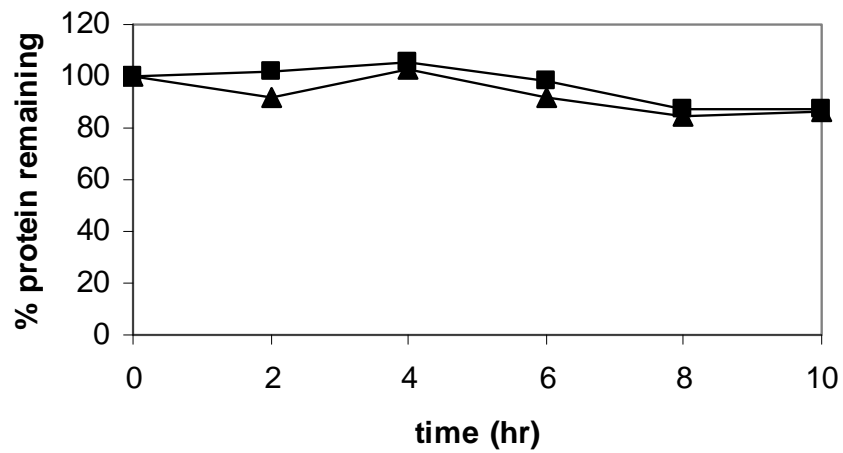

Supplement: M808032200_1.pdf [file M808032200_1.pdf]
